# Supplementary material for: Computed Tomography Radiomics Kinetics as Early Imaging Correlates of Osteoradionecrosis in Oropharyngeal Cancer Patients
Source: Front Artif Intell. 2021 Apr 9;4:618469. doi: 10.3389/frai.2021.618469 (PMC8063205; doi:10.3389/frai.2021.618469)
Supplement: Supplementary Table 2 — Filtered radiomic feature set. The final set of 16 features chosen after correlation filtering, which are used for building baseline, delta, and FPCA models. [file Table_2.XLSX]

## Sheet: Supplementary Table S2
Filtered set of radiomic features used for building baseline, delta, and FPCA models
Gray Level Cooccurence Matrix 25-333-1 InformationMeasureCorr1
Gray Level Cooccurence Matrix 32-7 ClusterShade
Gray Level Cooccurence Matrix 33-7 ClusterShade
Gray Level Cooccurence Matrix 37-4 ClusterShade
Gray Level Cooccurence Matrix 38-7 ClusterShade
Gray Level Cooccurence Matrix 310-7 ClusterShade
Gray Level Cooccurence Matrix 312-4 Cluster Shade
Gray Level Cooccurence Matrix 34-7 Contrast
Gray Level Cooccurence Matrix 30-7 Correlation
Gray Level Cooccurence Matrix 33-7 Dissimilarity
Gray Level Cooccurence Matrix 310-1 Dissimilarity
Gray Level Cooccurence Matrix 38-1 Inverse Diff Moment Norm
Intensity-Mean
Intensity- Local Entropy Max
Intensity - Local Entropy Median
Neighbor Intensity Difference 25 Texture Strength
